# Supplementary material for: Predicted compounds of radon with acetylene and water
Source: Royal Society of Chemistry journal article supplement (doi:10.1039/c0cp00875c), 2010-01-01
Supplement: c0cp00875c.pdf [file c0cp00875c.pdf]

# Predicted compounds of Radon with Acetylene and Water

Ehud Tsivion and R. Benny Gerber<sup>a,b</sup>

<sup>a</sup> Department of Physical Chemistry, Hebrew University, Jerusalem, Israel.

<sup>b</sup> Department of Chemistry, University of California, Irvine, California, USA.

E-mail: [benny@fh.huji.ac.il](mailto:benny@fh.huji.ac.il)

## Supplementary Information

### Table of Contents

|                             |   |
|-----------------------------|---|
| Harmonic Frequencies.....   | 2 |
| Geometrical structures..... | 3 |
| HR <sub>n</sub> CCH.....    | 3 |
| HR <sub>n</sub> OH.....     | 4 |

## Harmonic Frequencies

The computed harmonic vibrational spectrum of HRnCCH and HRnOH, as calculated at the AVDZ/MP2 level, are shown in Table 1 and Table 2.

**Table 1:** Harmonic IR frequencies and intensities for HRnOH (AVDZ/MP2)

| Vibration mode              | Frequency [cm <sup>-1</sup> ] | Intensity [Km mol <sup>-1</sup> ] |
|-----------------------------|-------------------------------|-----------------------------------|
| HO-Rn stretch               | 437.36                        | 133.04                            |
| H-Rn-O-H symmetric bend     | 535.82                        | 5.75                              |
| H-Rn-O oop bend             | 560.00                        | 1.29                              |
| H-Rn-O-H antisymmetric bend | 791.03                        | 5.94                              |
| H-Rn stretch                | 1738.61                       | 1034.39                           |
| H-O stretch                 | 3775.39                       | 60.14                             |

**Table 2:** Harmonic IR frequencies and intensities for HRnCCH (AVDZ/MP2)

| Vibration mode | Frequency [cm <sup>-1</sup> ] | Intensity [Km mol <sup>-1</sup> ] |
|----------------|-------------------------------|-----------------------------------|
| C-H stretch    | 3443.86                       | 30.88                             |
| C-C stretch    | 1932.44                       | 3.28                              |
| H-Rn stretch   | 1656.62                       | 1183.78                           |
| Bend           | 614.33                        | 3.52                              |
|                | 614.33                        | 3.55                              |
| Bend           | 592.06                        | 19.1                              |
|                | 592.04                        | 24.8                              |
| Rn-C stretch   | 313.91                        | 149.25                            |
| H-Rn-C bend    | 155.4                         | 12.7                              |
|                | 155.34                        | 12.68                             |

## Geometrical structures

### HRnCCH

#### Equilibrium structure (1)

Basis set: aug-cc-pvtz

Theory: CASPT2

Energy (Hartree): -364.67277893

No. of imaginary frequencies: 0

Geometry:

|    |              |               |               |
|----|--------------|---------------|---------------|
| H  | 0.0000000000 | -0.0000049234 | -4.4175831705 |
| C  | 0.0000000000 | -0.0000024974 | -3.3549561513 |
| C  | 0.0000000000 | 0.0000047333  | -2.1250160369 |
| Rn | 0.0000000000 | -0.0000001105 | 0.3065769257  |
| H  | 0.0000000000 | 0.0000026141  | 2.1897753241  |

#### Equilibrium structure (2)

Basis set: aug-cc-pvtz

Theory: MP2

Energy (Hartree): -364.67709116

No. of imaginary frequencies: 0

Geometry:

|    |              |               |               |
|----|--------------|---------------|---------------|
| H  | 0.0000000000 | -0.0000208384 | -4.3928342832 |
| C  | 0.0000000000 | -0.0000075553 | -3.3282496863 |
| C  | 0.0000000000 | 0.0000138222  | -2.0977502335 |
| Rn | 0.0000000000 | -0.0000001722 | 0.3037371069  |
| H  | 0.0000000000 | -0.0000159002 | 2.1473949763  |

#### 3B transition structure

Basis set: aug-cc-pvdz

Theory: CCSD(T)

Energy (Hartree): -364.56516927

No. of imaginary frequencies: 1

Geometry:

|    |              |              |               |
|----|--------------|--------------|---------------|
| H  | 0.0000000000 | 0.0000000000 | -4.8561047256 |
| C  | 0.0000000000 | 0.0000000000 | -3.7764233282 |
| C  | 0.0000000000 | 0.0000000000 | -2.5368189125 |
| Rn | 0.0000000000 | 0.0000000000 | 0.3494978102  |
| H  | 0.0000000000 | 0.0000000000 | 3.1037409800  |

#### 2B transition structure

Basis set: aug-cc-pvdz

Theory: MP2

Energy (Hartree): -364.47832024

No. of imaginary frequencies: 1

Geometry:

|    |              |               |               |
|----|--------------|---------------|---------------|
| H  | 0.0000000000 | 1.2342469971  | 3.9000240889  |
| C  | 0.0000000000 | 0.4061384467  | 3.2018294136  |
| C  | 0.0000000000 | -0.6725689545 | 2.5260280034  |
| Rn | 0.0000000000 | 0.0013380827  | -0.3276677816 |
| H  | 0.0000000000 | 1.6459036580  | 0.0195408317  |

## 2B Reaction products

Basis set: aug-cc-pvtz

Theory: MP2

Energy (Hartree): -364.83813314

No. of imaginary frequencies: 0

Geometry:

|    |              |               |               |
|----|--------------|---------------|---------------|
| H  | 0.0000000000 | 0.0000012134  | -6.0201227211 |
| C  | 0.0000000000 | 0.0000011214  | -4.9582707784 |
| C  | 0.0000000000 | -0.0000014428 | -3.7457389222 |
| Rn | 0.0000000000 | 0.0000000230  | 0.5103943077  |
| H  | 0.0000000000 | -0.0000024507 | -2.6833791737 |

## HRnOH

### Equilibrium structure (1)

Basis set: aug-cc-pvtz

Theory: CASPT2

Energy (Hartree): -363.81968479

No. of imaginary frequencies: 0

Geometry:

|    |               |              |               |
|----|---------------|--------------|---------------|
| H  | -0.7970329827 | 0.0000000000 | 2.5175278523  |
| O  | 0.0631176162  | 0.0000000000 | 2.0800554325  |
| Rn | -0.0011957842 | 0.0000000000 | -0.1522112479 |
| H  | 0.0585376549  | 0.0000000000 | -2.0076544077 |

### Equilibrium structure(2)

Basis set: aug-cc-pvtz

Theory: MP2

Energy (Hartree): -363.8461381

No. of imaginary frequencies: 0

Geometry:

|    |               |              |               |
|----|---------------|--------------|---------------|
| H  | -0.8302445448 | 0.0000000000 | 2.4774335305  |
| O  | 0.0636311737  | 0.0000000000 | 2.1087276149  |
| Rn | -0.0010692778 | 0.0000000000 | -0.1543009582 |
| H  | 0.0557319605  | 0.0000000000 | -1.9623866074 |

## 3B transition structure

Basis set: aug-cc-pvdz

Theory: CASPT2

Energy (Hartree): -363.69652555

No. of imaginary frequencies: 1

Geometry:

|    |              |               |               |
|----|--------------|---------------|---------------|
| H  | 0.0000000000 | 2.7290119200  | 0.9231237478  |
| O  | 0.0000000000 | 2.6430159263  | -0.0502016490 |
| Rn | 0.0000000000 | -0.1895964091 | -0.0012997045 |
| H  | 0.0000000000 | -2.9204402240 | 0.1600294214  |

## 2B transition structure

Basis set: aug-cc-pvdz

Theory: MP2

Energy (Hartree): -363.65709551

No. of imaginary frequencies: 1

Geometry:

|    |               |              |               |
|----|---------------|--------------|---------------|
| H  | -0.1226339700 | 0.0000000000 | 3.3111468202  |
| O  | 0.0121012834  | 0.0000000000 | 2.3516237124  |
| Rn | 0.0072802384  | 0.0000000000 | -0.1838229993 |
| H  | -1.6730618118 | 0.0000000000 | -0.1489007378 |

## 2B reaction products

Basis set: aug-cc-pvtz

Theory: MP2

Energy (Hartree): -364.00311180

No. of imaginary frequencies: 0

Geometry:

|    |               |              |               |
|----|---------------|--------------|---------------|
| H  | -0.8513381253 | 0.0000000000 | -4.0053860946 |
| O  | 0.0588150443  | 0.0000000000 | -3.6952636819 |
| Rn | -0.0002771003 | 0.0000000000 | 0.2969001413  |
| H  | -0.0212180757 | 0.0000000000 | -2.7361117749 |
